# Supplementary material for: An Adaptive Generalized Leaky Integrate-and-Fire Model for Hippocampal CA1 Pyramidal Neurons and Interneurons
Source: Springer Nature journal article supplement (doi:10.1007/s11538-023-01206-8), 2023-10-04
Supplement: 11538_2023_1206_MOESM1_ESM.pdf [file 11538_2023_1206_MOESM1_ESM.pdf]

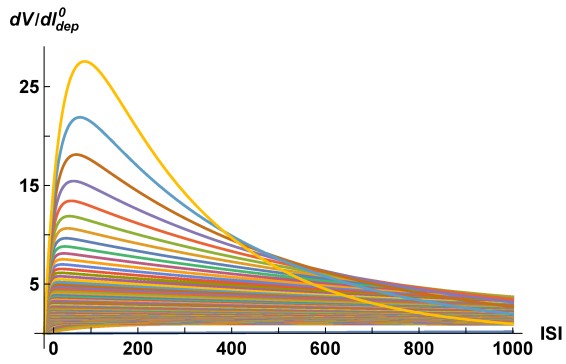

**Suppl. Fig. 1** Plot of the derivative of  $V$  respect to  $I_{\text{dep}}^0$ . Plot of the derivative (32) as function of  $t - t^0$  obtained imposing the conditions (21) with a step of 0.01 for the parameter  $\delta$ .
