# Supplementary material for: An Adaptive Generalized Leaky Integrate-and-Fire Model for Hippocampal CA1 Pyramidal Neurons and Interneurons
Source: Springer Nature journal article supplement (doi:10.1007/s11538-023-01206-8), 2023-10-04
Supplement: 11538_2023_1206_MOESM2_ESM.pdf [file 11538_2023_1206_MOESM2_ESM.pdf]

Suppl. Table 1: List of parameters appearing in the manuscript, together with their description.

| Parameter                                               | Description                                                                                                                                            |
|---------------------------------------------------------|--------------------------------------------------------------------------------------------------------------------------------------------------------|
| $E_L$                                                   | resting potential                                                                                                                                      |
| $V_r$                                                   | reset potential                                                                                                                                        |
| $V_{th}$                                                | threshold potential                                                                                                                                    |
| $I_{stim}$                                              | external stimulation current                                                                                                                           |
| $C_m$                                                   | membrane capacitance                                                                                                                                   |
| $\tau_m$                                                | membrane time constant                                                                                                                                 |
| $I_{th}$                                                | threshold stimulation current                                                                                                                          |
| $k_{adap}$                                              | adaptation constant                                                                                                                                    |
| $k_2$                                                   | $I_{adap}$ decay rate                                                                                                                                  |
| $k_1$                                                   | $I_{dep}$ decay rate                                                                                                                                   |
| $\Delta t_{ref}$                                        | refractory interval                                                                                                                                    |
| $t_{spk}$                                               | spike time                                                                                                                                             |
| $t_{spk}^+$                                             | time instant following $t_{spk} + \Delta t_{ref}$                                                                                                      |
| $t_{start}$                                             | last instant in which $I_{stim} = 0$ or $I_{stim} \leq I_{th}$ , while for piecewise constant stimulation currents it is updated according to Eq. (56) |
| $T$                                                     | final stimulation time                                                                                                                                 |
| $I_{dep}^{start}$                                       | initial datum of $I_{dep}$ at $t_{start}$                                                                                                              |
| $I_{adap}^0$                                            | initial datum for $I_{adap}$ after the first spike                                                                                                     |
| $I_{dep}^0$                                             | initial datum for $I_{dep}$ after the first spike                                                                                                      |
| $V^0$                                                   | initial datum for the membrane potential                                                                                                               |
| $\alpha = -\frac{I_{stim}}{C_m E_L k_2}$                | parameter of the nondimensional model                                                                                                                  |
| $\beta = \frac{k_{adap}}{C_m k_2^2}$                    | parameter of the nondimensional model                                                                                                                  |
| $\gamma = \frac{k_1}{k_2}$                              | parameter of the nondimensional model                                                                                                                  |
| $\delta = \frac{1}{k_2 \tau_m}$                         | parameter of the nondimensional model                                                                                                                  |
| $\tau = \frac{1}{k_2}$                                  | parameter of the nondimensional model                                                                                                                  |
| $K$                                                     | scaling factor used in the nondimensional model                                                                                                        |
| $I_{stim}^{min}$                                        | minimum experimental constant stimulation current                                                                                                      |
| $I_{stim}^{max}$                                        | maximum experimental constant stimulation current                                                                                                      |
| $F(I_{stim}, \chi)$                                     | Monod function                                                                                                                                         |
| $a, b, c, d$                                            | parameters of the Monod function                                                                                                                       |
| $\chi = t_{spk}^+ - t_{start}$                          | time parameter used in the Monod function                                                                                                              |
| $P(I_{stim})$                                           | plateau of the Monod function                                                                                                                          |
| $H(I_{stim})$                                           | superior limit for $I_{adap}^0(\chi, I_{stim})$ defined in Eq. (36)                                                                                    |
| $A_{I,II}^{sup}$ (resp. $A_{I,II}^{inf}$ )              | coefficient of $I_{stim}$ related to the superior (resp. inferior) Monod block line                                                                    |
| $B_{I,II}^{sup}$ (resp. $B_{I,II}^{inf}$ )              | known term related to the superior (resp. inferior) Monod block line                                                                                   |
| $[I_{block}^I, I_{block}^{II}]$                         | range of currents in which a firing block occurs                                                                                                       |
| $I_{fire}$                                              | closest stimulation current above $I_{block}^{II}$ or below $I_{block}^I$ for which the firing block does not occur                                    |
| $I_{block}^{inf} = \frac{I_{block}^{II} + I_{fire}}{2}$ | when $I_{fire} > I_{block}^{II}$                                                                                                                       |
| $I_{block}^{sup} = \frac{I_{block}^I + I_{fire}}{2}$    | when $I_{fire} < I_{block}^I$                                                                                                                          |
| $t_{spk}^{last}$                                        | time of the last spike event for the current $I_{stim}$                                                                                                |
| $ISI_{last}$                                            | ISI of the last spike event for the current $I_{stim}$                                                                                                 |
| $ISI_{last}^I$                                          | defined as $ISI_{last}(I_{block}^I)$                                                                                                                   |
| $ISI_{last}^{II}$                                       | defined as $ISI_{last}(I_{block}^{II})$                                                                                                                |
| $t_{spk}^{first}$                                       | first spike time                                                                                                                                       |
| $t_{spk}^{last}$                                        | last spike time                                                                                                                                        |
| $t_{spk}^{last-1}$                                      | second-last spike time                                                                                                                                 |
