# Supplementary material for: An Adaptive Generalized Leaky Integrate-and-Fire Model for Hippocampal CA1 Pyramidal Neurons and Interneurons
Source: Springer Nature journal article supplement (doi:10.1007/s11538-023-01206-8), 2023-10-04
Supplement: 11538_2023_1206_MOESM3_ESM.pdf [file 11538_2023_1206_MOESM3_ESM.pdf]

| time (ms) | 0-200 | 200-240 | 240-300 | 300-340 | 340-400 | 400-500 | 500-600 | 600-800 | 800-1000 |
|-----------|-------|---------|---------|---------|---------|---------|---------|---------|----------|
| panel A   | 0     | 600     |         | 400     |         |         | 1000    | 0       | 400      |
| panel B   | 0     | 400     |         |         |         | 700     |         | 200     | 1000     |
| panel C   | 0     | 600     |         |         |         | 500     |         | 250     | 1000     |
| panel D   | 0     | 600     |         |         |         | 500     |         | 800     | 1000     |
| panel E   | 0     | 600     | 500     | 600     | 400     | 800     |         |         | 1000     |
| panel F   | 0     | 1000    |         |         |         | 800     |         | 400     | 1000     |

Suppl. Table 2: Piecewise constant currents used in Fig. 8.
