# Supplementary material for: An Adaptive Generalized Leaky Integrate-and-Fire Model for Hippocampal CA1 Pyramidal Neurons and Interneurons
Source: Springer Nature journal article supplement (doi:10.1007/s11538-023-01206-8), 2023-10-04
Supplement: 11538_2023_1206_MOESM5_ESM.pdf [file 11538_2023_1206_MOESM5_ESM.pdf]

**PYRAMIDAL NEURONS**

| #  | NEURON ID. | I <sup>start</sup> <sub>dep</sub> | I <sup>0</sup> <sub>dep</sub> | a                     | b                      | c                   | d                     |
|----|------------|-----------------------------------|-------------------------------|-----------------------|------------------------|---------------------|-----------------------|
| 1  | 95810005   | 0.012                             | 0.64                          | $6.91 \times 10^{13}$ | -0.00036               | 0.0847              | $4.49 \times 10^{15}$ |
| 2  | 95810006   | 0.020                             | 0.44                          | 6.39                  | -0.000494              | -3.15               | 1.08                  |
| 3  | 95810007   | 0.019                             | 0.14                          | $2.4 \times 10^{12}$  | 0.00113                | 0.0574              | $1.21 \times 10^{15}$ |
| 4  | 95810008   | 0.0044                            | 0.37                          | $4.81 \times 10^{13}$ | -0.000585              | -0.708              | $1.89 \times 10^{15}$ |
| 5  | 95810010   | 0.0070                            | 0.37                          | 44.7                  | -0.0000338             | -42.9               | 0.081                 |
| 6  | 95810011   | 0.013                             | 0.57                          | 8.79                  | -0.000814              | -0.198              | 273.                  |
| 7  | 95810012   | 0.44                              | 53.                           | 75.5                  | -0.000239              | -10.6               | 15.2                  |
| 8  | 95810013   | 0.73                              | 92.                           | 138.                  | -0.000176              | -22.8               | 14.7                  |
| 9  | 95810014   | 0.48                              | 58.                           | 87.7                  | -0.000262              | -11.4               | 15.1                  |
| 10 | 95810015   | 0.36                              | 92.                           | 176.                  | -0.0000395             | -74.9               | 2.42                  |
| 11 | 95810022   | 0.0087                            | 1.4                           | 7.47                  | -0.000322              | -1.19               | 93.4                  |
| 12 | 95810023   | 0.0074                            | 1.1                           | 6.02                  | -0.000154              | -1.28               | 81.5                  |
| 13 | 95810024   | 0.0082                            | 1.3                           | 6.51                  | -0.00019               | -1.44               | 64.3                  |
| 14 | 95810025   | 0.037                             | 0.56                          | 3.53                  | 0.000154               | 0.177               | 507.                  |
| 15 | 95810026   | 0.0086                            | 0.75                          | 3.91                  | -0.000504              | -0.327              | 78.2                  |
| 16 | 95810027   | 0.012                             | 1.2                           | 8.59                  | -0.00117               | -0.378              | 105.                  |
| 17 | 95810028   | 0.025                             | 0.69                          | 4.00                  | -0.00077               | -0.184              | 92.2                  |
| 18 | 95810029   | 0.15                              | 0.55                          | 4.94                  | -0.00104               | -0.0797             | 174.                  |
| 19 | 95810030   | 0.024                             | 3.0                           | 8.32                  | -0.000429              | -0.662              | 91.4                  |
| 20 | 95810031   | 0.21                              | 82.                           | 50700.                | $3.88 \times 10^{-7}$  | -50600.             | 0.0255                |
| 21 | 95810032   | 0.54                              | 82.                           | 8300.                 | $2.44 \times 10^{-6}$  | -8210.              | 0.0378                |
| 22 | 95810033   | 0.77                              | 90.                           | 163.                  | -0.000131              | -35.9               | 12.2                  |
| 23 | 95810037   | 0.31                              | 95.                           | 163.                  | -0.0000401             | -44.6               | 9.34                  |
| 24 | 95810038   | 0.59                              | 81.                           | 142.                  | -0.000152              | -18.0               | 31.4                  |
| 25 | 95810039   | 0.43                              | 59.                           | 100.                  | -0.00012               | -14.5               | 35.4                  |
| 26 | 95810040   | 0.64                              | 90.                           | 161.                  | -0.00012               | -25.1               | 38.4                  |
| 27 | 95810041   | 0.0077                            | 1.7                           | 6.09                  | -0.0000739             | -1.76               | 41.4                  |
| 28 | 95817003   | 0.0017                            | 0.21                          | 244000.               | $3.06 \times 10^{-9}$  | -244000.            | 0.000103              |
| 29 | 95817004   | 0.0064                            | 0.11                          | 5.16                  | 0.000185               | -4.42               | 5.27                  |
| 30 | 95817005   | 0.0098                            | 0.52                          | $1.88 \times 10^8$    | 0.000170               | 0.0348              | $2.41 \times 10^{10}$ |
| 31 | 95817006   | 0.013                             | 0.71                          | 63.                   | $-9.77 \times 10^{-6}$ | -61.7               | 0.00639               |
| 32 | 95817007   | 0.0081                            | 1.2                           | 3.79                  | -0.0000382             | -0.443              | 113.                  |
| 33 | 95817008   | 0.0041                            | 0.59                          | 6.42                  | -0.000162              | -0.46               | 541.                  |
| 34 | 95822000   | 0.24                              | 98.                           | 23700.                | $1.77 \times 10^{-6}$  | -23600.             | 0.0803                |
| 35 | 95822001   | 0.54                              | 79.                           | 177.                  | 0.0000507              | -29.8               | 43.9                  |
| 36 | 95822002   | 0.85                              | 6.6                           | $2.07 \times 10^7$    | $5.94 \times 10^{-9}$  | $-2.07 \times 10^7$ | 0.000031              |
| 37 | 95822003   | 0.20                              | 15.                           | $5.09 \times 10^6$    | $6.18 \times 10^{-9}$  | $-5.09 \times 10^6$ | 0.0000188             |
| 38 | 95822005   | 0.10                              | 26.                           | 56.9                  | 0.0000333              | -28.5               | 3.53                  |
| 39 | 95822006   | 0.57                              | 61.                           | 126.                  | -0.000163              | -14.5               | 45.3                  |
| 40 | 95822009   | 0.066                             | 27.                           | 83.9                  | -0.0000856             | -49.2               | 0.934                 |
| 41 | 95822010   | 0.0057                            | 0.081                         | $5.99 \times 10^{14}$ | -0.00115               | -0.0839             | $2.04 \times 10^{16}$ |
| 42 | 95822011   | 0.011                             | 0.11                          | 1.84                  | -0.000693              | -0.0471             | 77.9                  |
| 43 | 95824000   | 0.15                              | 39.                           | 74.8                  | 0.000153               | -20.1               | 26.8                  |
| 44 | 95824004   | 0.013                             | 0.14                          | $3.58 \times 10^{12}$ | 0.00175                | 0.103               | $3.64 \times 10^{15}$ |
| 45 | 95824006   | 0.51                              | 94.                           | 135.                  | 0.0000378              | -37.9               | 5.74                  |
| 46 | 95831000   | 0.010                             | 1.5                           | 4.23                  | -0.000369              | -0.353              | 110.                  |
| 47 | 95831001   | 0.22                              | 49.                           | $1.99 \times 10^7$    | $2.89 \times 10^{-10}$ | $-1.99 \times 10^7$ | $5.87 \times 10^{-6}$ |
| 48 | 95831002   | 0.016                             | 0.86                          | 3.88                  | -0.000648              | -0.134              | 203.                  |
| 49 | 95831003   | 0.0054                            | 0.35                          | 4.67                  | -0.000982              | -0.0384             | 365.                  |
| 50 | 95831004   | 0.32                              | 99.                           | 337.                  | -0.0000154             | -201.               | 6.73                  |
| 51 | 95912004   | 0.090                             | 54.                           | 173.                  | -0.0000398             | -104.               | 6.83                  |
| 52 | 95912005   | 0.11                              | 9.0                           | 47.                   | 0.000584               | -29.                | 18.7                  |
| 53 | 95912006   | 0.14                              | 86.                           | 528.                  | $-2.93 \times 10^{-6}$ | -434.               | 1.68                  |
| 54 | 95912007   | 0.63                              | 58.                           | 116.                  | 0.000302               | -32.8               | 22.7                  |
| 55 | 95914001   | 0.0069                            | 0.36                          | 2.29                  | 0.000236               | -1.69               | 5.08                  |
| 56 | 95914002   | 0.016                             | 0.60                          | 4.55                  | -0.000361              | -0.469              | 83.4                  |
| 57 | 95914003   | 0.017                             | 1.0                           | 3.47                  | -0.00023               | -0.291              | 64.6                  |
| 58 | 95914004   | 0.026                             | 0.99                          | 4.65                  | -0.00023               | -0.027              | 164.                  |

**INTERNEURONS -- BAC**

|   |          |       |     |                    |                         |                     |           |
|---|----------|-------|-----|--------------------|-------------------------|---------------------|-----------|
| 1 | 96711008 | 0.96  | 11. | 2060.              | $-4.04 \times 10^{-6}$  | -2050.              | 0.0103    |
| 2 | 97911000 | 0.048 | 13. | 6.89               | 0.001                   | -1.21               | 9.65      |
| 3 | 97911001 | 0.030 | 15. | $4.50 \times 10^6$ | $-6.35 \times 10^{-10}$ | $-4.50 \times 10^6$ | 0.0000204 |
| 4 | 97911002 | 0.070 | 44. | $5.05 \times 10^6$ | $8.44 \times 10^{-10}$  | $-5.05 \times 10^6$ | 0.0000433 |
| 5 | 99111000 | 0.078 | 21. | 43.3               | -0.000817               | 7.68                | 80.0      |
| 6 | 99111001 | 0.046 | 15. | 24.5               | -0.000376               | 2.44                | 87.5      |
| 7 | 99111002 | 0.98  | 79. | 130.               | -0.000612               | 15.3                | 71.4      |

**INTERNEURONS -- CAC**

|    |          |       |      |       |            |        |       |
|----|----------|-------|------|-------|------------|--------|-------|
| 1  | 97428000 | 0.31  | 92.  | 40.4  | -0.00137   | 71.1   | 10    |
| 2  | 97428001 | 0.92  | 78.  | 32.4  | -0.00128   | 68.3   | 60.0  |
| 3  | 97509008 | 0.018 | 6.3  | 183.  | -0.0000709 | -169.  | 0.188 |
| 4  | 97509009 | 0.24  | 0.28 | 0.956 | 0.000411   | 0.149  | 264.  |
| 5  | 97509010 | 0.037 | 14.  | 37.6  | -0.000890  | -0.109 | 32.4  |
| 6  | 97509011 | 0.024 | 1.6  | 64.8  | -0.00333   | -0.658 | 25.0  |
| 7  | 98205021 | 0.21  | 25.  | 39.4  | -0.00130   | 3.81   | 22.9  |
| 8  | 98205022 | 0.14  | 20.  | 46.9  | -0.00138   | -0.510 | 73.1  |
| 9  | 98205024 | 0.094 | 21.  | 147.  | -0.00259   | -1.97  | 107.  |
| 10 | 98205025 | 0.096 | 23.  | 93.7  | -0.00191   | -2.94  | 49.9  |

**INTERNEURONS -- CNAC**

|   |          |        |     |       |           |        |        |
|---|----------|--------|-----|-------|-----------|--------|--------|
| 1 | 95817000 | 0.10   | 7.0 | 34.3  | -0.00198  | -3.5   | 3.56   |
| 2 | 95817001 | 0.16   | 5.8 | 29.2  | -0.00249  | -0.204 | 29.8   |
| 3 | 95817002 | 0.11   | 5.5 | 44.4  | -0.00308  | 0.210  | 49.2   |
| 4 | 97717005 | 0.053  | 7.0 | 123.  | -0.000173 | -103.  | 0.0277 |
| 5 | 98513011 | 0.030  | 13. | 60.6  | -0.000563 | -33.5  | 0.736  |
| 6 | 99111004 | 0.70   | 98. | 373.  | -0.00817  | -0.142 | 10     |
| 7 | 99111006 | 0.40   | 88. | 164.  | -0.00151  | -29.1  | 2.87   |
| 8 | 98D15008 | 0.0099 | 7.5 | 92.3  | -0.000134 | -75.6  | 0.698  |
| 9 | 98D15009 | 0.76   | 3.4 | -526. | -0.515    | 1.75   | 3.95   |

**NEURON**

|   |        |       |     |      |          |        |       |
|---|--------|-------|-----|------|----------|--------|-------|
| 1 | NEURON | 0.018 | 1.0 | 14.3 | -0.00211 | 0.0609 | 225.5 |
|---|--------|-------|-----|------|----------|--------|-------|

**LAYER 5 VISUAL CORTEX NEURON**

|   |           |       |     |      |          |          |       |
|---|-----------|-------|-----|------|----------|----------|-------|
| 1 | 476048909 | 0.029 | 1.1 | 21.7 | -0.00672 | -0.01669 | 412.7 |
|---|-----------|-------|-----|------|----------|----------|-------|
