# Supplementary material for: An Adaptive Generalized Leaky Integrate-and-Fire Model for Hippocampal CA1 Pyramidal Neurons and Interneurons
Source: Springer Nature journal article supplement (doi:10.1007/s11538-023-01206-8), 2023-10-04
Supplement: 11538_2023_1206_MOESM6_ESM.pdf [file 11538_2023_1206_MOESM6_ESM.pdf]

| PYRAMIDAL NEURONS            |            |                   |                  |                  |                   |                  |                  |
|------------------------------|------------|-------------------|------------------|------------------|-------------------|------------------|------------------|
| #                            | NEURON ID. | $I_{block}^{sup}$ | $A_{I,II}^{sup}$ | $B_{I,II}^{sup}$ | $I_{block}^{inf}$ | $A_{I,II}^{inf}$ | $B_{I,II}^{inf}$ |
| 1                            | 95 810 005 | --                | --               | --               | 900.0             | 1.141            | -711.6           |
| 2                            | 95 810 006 | --                | --               | --               | --                | --               | --               |
| 3                            | 95 810 007 | 900.0             | -1.4303          | 1658.1           | --                | --               | --               |
| 4                            | 95 810 008 | 700.0             | 0.1025           | 121.65           | --                | --               | --               |
| 5                            | 95 810 010 | 900.0             | -0.68475         | 852.7            | --                | --               | --               |
| 6                            | 95 810 011 | --                | --               | --               | --                | --               | --               |
| 7                            | 95 810 012 | --                | --               | --               | --                | --               | --               |
| 8                            | 95 810 013 | --                | --               | --               | --                | --               | --               |
| 9                            | 95 810 014 | --                | --               | --               | --                | --               | --               |
| 10                           | 95 810 015 | --                | --               | --               | 300.0             | 0.835            | 52.4             |
| 11                           | 95 810 022 | --                | --               | --               | --                | --               | --               |
| 12                           | 95 810 023 | --                | --               | --               | --                | --               | --               |
| 13                           | 95 810 024 | --                | --               | --               | --                | --               | --               |
| 14                           | 95 810 025 | --                | --               | --               | 500.0             | 0.8655           | -66.75           |
| 15                           | 95 810 026 | --                | --               | --               | --                | --               | --               |
| 16                           | 95 810 027 | --                | --               | --               | 700.0             | 0.5935           | -102.9           |
| 17                           | 95 810 028 | --                | --               | --               | --                | --               | --               |
| 18                           | 95 810 029 | --                | --               | --               | --                | --               | --               |
| 19                           | 95 810 030 | --                | --               | --               | --                | --               | --               |
| 20                           | 95 810 031 | --                | --               | --               | 300.0             | 0.96325          | -51.95           |
| 21                           | 95 810 032 | --                | --               | --               | 300.0             | 0.42125          | 143.85           |
| 22                           | 95 810 033 | --                | --               | --               | 300.0             | 1.6185           | -138.95          |
| 23                           | 95 810 037 | --                | --               | --               | --                | --               | --               |
| 24                           | 95 810 038 | --                | --               | --               | --                | --               | --               |
| 25                           | 95 810 039 | --                | --               | --               | --                | --               | --               |
| 26                           | 95 810 040 | --                | --               | --               | --                | --               | --               |
| 27                           | 95 810 041 | --                | --               | --               | --                | --               | --               |
| 28                           | 95 817 003 | --                | --               | --               | --                | --               | --               |
| 29                           | 95 817 004 | --                | --               | --               | --                | --               | --               |
| 30                           | 95 817 005 | 800               | 0.0675           | 58.65            | 800               | -0.33            | 376.65           |
| 31                           | 95 817 006 | 800               | -0.07075         | 207.9            | 800               | 0.09775          | 73.1             |
| 32                           | 95 817 007 | --                | --               | --               | --                | --               | --               |
| 33                           | 95 817 008 | --                | --               | --               | --                | --               | --               |
| 34                           | 95 822 000 | --                | --               | --               | 500.0             | 0.011            | 194.95           |
| 35                           | 95 822 001 | --                | --               | --               | 300.0             | 1.7768           | -193.1           |
| 36                           | 95 822 002 | 900.0             | -1.436           | 1611.2           | 500.0             | 0.443            | -46.15           |
| 37                           | 95 822 003 | 377               | 0.01275          | 130.65           | 377               | 0.519            | -60.             |
| 38                           | 95 822 005 | 900.0             | -0.07275         | 403.95           | 700.0             | 0.4005           | 7.05             |
| 39                           | 95 822 006 | --                | --               | --               | 500.0             | -0.4665          | 321.15           |
| 40                           | 95 822 009 | 600.0             | -0.13125         | 232.5            | 600.0             | 0.0735           | 15.3             |
| 41                           | 95 822 010 | 900.0             | -1.9928          | 2075.            | 700.0             | 2.1225           | -1217.3          |
| 42                           | 95 822 011 | 900.0             | -0.42025         | 503.7            | 900.0             | -0.42025         | 503.7            |
| 43                           | 95 824 000 | --                | --               | --               | --                | --               | --               |
| 44                           | 95 824 004 | 700.0             | -0.46625         | 612.45           | --                | --               | --               |
| 45                           | 95 824 006 | --                | --               | --               | --                | --               | --               |
| 46                           | 95 831 000 | --                | --               | --               | --                | --               | --               |
| 47                           | 95 831 001 | 492               | -0.018           | 173.95           | 492               | 0.4635           | -63.             |
| 48                           | 95 831 002 | --                | --               | --               | --                | --               | --               |
| 49                           | 95 831 003 | --                | --               | --               | --                | --               | --               |
| 50                           | 95 831 004 | --                | --               | --               | 300.0             | 0.58975          | 86.05            |
| 51                           | 95 912 004 | --                | --               | --               | 300.0             | 1.141            | -130.85          |
| 52                           | 95 912 005 | --                | --               | --               | --                | --               | --               |
| 53                           | 95 912 006 | --                | --               | --               | --                | --               | --               |
| 54                           | 95 912 007 | --                | --               | --               | --                | --               | --               |
| 55                           | 95 914 001 | --                | --               | --               | 900.0             | -0.0875          | 160.7            |
| 56                           | 95 914 002 | 700.0             | 0.15125          | 77.              | --                | --               | --               |
| 57                           | 95 914 003 | 500.0             | 0.1175           | 112.45           | --                | --               | --               |
| 58                           | 95 914 004 | 700.0             | -0.024           | 275.45           | 700.0             | 0.0985           | 124.85           |
| INTERNEURONS -- BAC          |            |                   |                  |                  |                   |                  |                  |
| 1                            | 96 711 008 | 700.0             | 0.74575          | -436.3           | --                | --               | --               |
| 2                            | 97 911 000 | --                | --               | --               | 900.0             | 0.336            | -173.6           |
| 3                            | 97 911 001 | --                | --               | --               | 700.0             | 1.8775           | -1092.5          |
| 4                            | 97 911 002 | 900.0             | -0.19625         | 553.3            | 700.0             | 1.2095           | -447.65          |
| 5                            | 99 111 000 | 500.0             | 0.26             | 60.15            | --                | --               | --               |
| 6                            | 99 111 001 | --                | --               | --               | 700.0             | 0.38775          | -10.4            |
| 7                            | 99 111 002 | 700.0             | 0.11125          | 221.85           | 500.0             | -0.8155          | 447.05           |
| INTERNEURONS -- CAC          |            |                   |                  |                  |                   |                  |                  |
| 1                            | 97 428 000 | --                | --               | --               | 300.0             | 0.95975          | 32.              |
| 2                            | 97 428 001 | --                | --               | --               | --                | --               | --               |
| 3                            | 97 509 008 | 900.0             | -0.08575         | 460.7            | --                | --               | --               |
| 4                            | 97 509 009 | --                | --               | --               | --                | --               | --               |
| 5                            | 97 509 010 | --                | --               | --               | --                | --               | --               |
| 6                            | 97 509 011 | 900.0             | -0.57425         | 738.             | 700.0             | 0.714            | -292.6           |
| 7                            | 98 205 021 | 700.0             | -1.0095          | 996.8            | --                | --               | --               |
| 8                            | 98 205 022 | 700.0             | -0.22075         | 542.85           | --                | --               | --               |
| 9                            | 98 205 024 | --                | --               | --               | 500.0             | 0.80075          | -81.2            |
| 10                           | 98 205 025 | --                | --               | --               | 500.0             | 0.89825          | -144.65          |
| INTERNEURONS -- CNAC         |            |                   |                  |                  |                   |                  |                  |
| 1                            | 95 817 000 | --                | --               | --               | 700.0             | 0.896            | -201.5           |
| 2                            | 95 817 001 | --                | --               | --               | 700.0             | 0.47325          | 31.2             |
| 3                            | 95 817 002 | --                | --               | --               | --                | --               | --               |
| 4                            | 97 717 005 | --                | --               | --               | --                | --               | --               |
| 5                            | 98 513 011 | --                | --               | --               | --                | --               | --               |
| 6                            | 99 111 004 | 300.0             | -0.10325         | 331.8            | --                | --               | --               |
| 7                            | 99 111 006 | 500.0             | -0.1675          | 378.35           | 300.0             | 0.68075          | 123.8            |
| 8                            | 98D15008   | --                | --               | --               | 700.0             | 0.04275          | 358.35           |
| 9                            | 98D15009   | --                | --               | --               | --                | --               | --               |
| NEURON                       |            |                   |                  |                  |                   |                  |                  |
| 1                            | NEURON     | --                | --               | --               | 700.0             | 0.68             | -190.            |
| LAYER 5 VISUAL CORTEX NEURON |            |                   |                  |                  |                   |                  |                  |
| 1                            | 476048909  | --                | --               | --               | 280.              | 7.66075          | 1321.26          |
