# Supplementary material for: An Adaptive Generalized Leaky Integrate-and-Fire Model for Hippocampal CA1 Pyramidal Neurons and Interneurons
Source: Springer Nature journal article supplement (doi:10.1007/s11538-023-01206-8), 2023-10-04
Supplement: 11538_2023_1206_MOESM7_ESM.pdf [file 11538_2023_1206_MOESM7_ESM.pdf]

| PYRAMIDAL NEURONS            |            |            |            |            |              |            |            |
|------------------------------|------------|------------|------------|------------|--------------|------------|------------|
| <b>NEURON ID</b>             | 95 810 005 | 95 810 006 | 95 810 007 | 95 810 008 | 95 810 010   | 95 810 011 | 95 810 012 |
| <b>p-value</b>               | 0.8976     | 0.6095     | 0.983      | 0.9541     | 0.5977       | 0.6747     | 0.9786     |
| <b>NEURON ID</b>             | 95 810 013 | 95 810 014 | 95 810 015 | 95 810 022 | 95 810 023   | 95 810 024 | 95 810 025 |
| <b>p-value</b>               | 0.9938     | 0.9634     | 0.8806     | 0.827      | 0.9489       | 0.6236     | 0.9633     |
| <b>NEURON ID</b>             | 95 810 026 | 95 810 027 | 95 810 028 | 95 810 029 | 95 810 030   | 95 810 031 | 95 810 032 |
| <b>p-value</b>               | 0.691      | 0.8964     | 0.7784     | 0.8993     | 0.8572       | 0.8981     | 0.5527     |
| <b>NEURON ID</b>             | 95 810 033 | 95 810 037 | 95 810 038 | 95 810 039 | 95 810 040   | 95 810 041 | 95 817 003 |
| <b>p-value</b>               | 0.743      | 0.951      | 0.9814     | 0.8039     | 0.918        | 0.8884     | 0.8208     |
| <b>NEURON ID</b>             | 95 817 004 | 95 817 005 | 95 817 006 | 95 817 007 | 95 817 008   | 95 822 000 | 95 822 001 |
| <b>p-value</b>               | 0.4466     | 0.9999     | 0.9928     | 0.7643     | 0.8815       | 0.9888     | 0.9674     |
| <b>NEURON ID</b>             | 95 822 002 | 95 822 003 | 95 822 005 | 95 822 006 | 95 822 009   | 95 822 010 | 95 822 011 |
| <b>p-value</b>               | 0.991      | 0.4436     | 0.6812     | 0.5597     | 0.9062       | 0.972      | 0.9776     |
| <b>NEURON ID</b>             | 95 824 000 | 95 824 004 | 95 824 006 | 95 831 000 | 95 831 001   | 95 831 002 | 95 831 003 |
| <b>p-value</b>               | 0.9607     | 0.9078     | 0.9997     | 0.9107     | 0.7766       | 0.9713     | 0.9438     |
| <b>NEURON ID</b>             | 95 831 004 | 95 912 004 | 95 912 005 | 95 912 006 | 95 912 007   | 95 914 001 | 95 914 002 |
| <b>p-value</b>               | 0.9076     | 0.934      | 0.9997     | 0.9912     | 0.9746       | 0.229      | 0.8395     |
| <b>NEURON ID</b>             | 95 914 003 | 95 914 004 |            |            |              |            |            |
| <b>p-value</b>               | 0.9197     | 0.9521     |            |            |              |            |            |
| INTERNEURONS -- BAC          |            |            |            |            |              |            |            |
| <b>NEURON ID</b>             | 96 711 008 | 97 911 000 | 97 911 001 | 97 911 002 | 99 111 000   | 99 111 001 | 99 111 002 |
| <b>p-value</b>               | 0.4322     | 0.2462     | 0.06776    | 0.3647     | 0.6132       | 0.6433     | 0.9832     |
| INTERNEURONS -- CAC          |            |            |            |            |              |            |            |
| <b>NEURON ID</b>             | 97 428 000 | 97 428 001 | 97 509 008 | 97 509 009 | 97 509 010 * | 97 509 011 | 98 205 021 |
| <b>p-value</b>               | 0.05848    | 0.7148     | 0.1837     | 0.939      | 0.02443      | 0.8539     | 0.9761     |
| <b>NEURON ID</b>             | 98 205 022 | 98 205 024 | 98 205 025 |            |              |            |            |
| <b>p-value</b>               | 0.991      | 0.0567 *   | 0.9484     |            |              |            |            |
| INTERNEURONS -- CNAC         |            |            |            |            |              |            |            |
| <b>NEURON ID</b>             | 95 817 000 | 95 817 001 | 95 817 002 | 97 717 005 | 98 513 011   | 99 111 004 | 99 111 006 |
| <b>p-value</b>               | 0.8857     | 0.7375     | 0.7322     | 0.3555     | 0.8205       | 0.07709    | 0.8737     |
| <b>NEURON ID</b>             | 98D15008   |            |            |            |              |            |            |
| <b>p-value</b>               | 0.7246     |            |            |            |              |            |            |
| NEURON                       |            |            |            |            |              |            |            |
| <b>NEURON ID</b>             | NEURON     |            |            |            |              |            |            |
| <b>p-value</b>               | 0.999937   |            |            |            |              |            |            |
| LAYER 5 VISUAL CORTEX NEURON |            |            |            |            |              |            |            |
| <b>NEURON ID</b>             | 476048909  |            |            |            |              |            |            |
| <b>p-value</b>               | 0.8288     |            |            |            |              |            |            |
