# Supplementary material for: An Adaptive Generalized Leaky Integrate-and-Fire Model for Hippocampal CA1 Pyramidal Neurons and Interneurons
Source: Springer Nature journal article supplement (doi:10.1007/s11538-023-01206-8), 2023-10-04
Supplement: 11538_2023_1206_MOESM9_ESM.pdf [file 11538_2023_1206_MOESM9_ESM.pdf]

## Suppl. Section 2: $a < 0$

In this section we carry out the analysis of the Monod function  $I_{\text{adap}}^0(\chi, I_{\text{stim}})$  for  $I_{\text{stim}}$  outside the experimental range  $[I_{\text{stim}}^{\min}, I_{\text{stim}}^{\max}]$  in the case  $a < 0$ . Due to the positivity constraint (35) on the Monod function, we consider here only  $c > 0$  (otherwise, being the Monod function monotonically decreasing w.r.t.  $\chi$  as shown in Prop.1, we would immediately have  $I_{\text{adap}}^0(\chi, I_{\text{stim}}) < 0$  for all  $\chi > 0$ ).

(2.1)  $b > 0$ . According to Prop. 1, under these conditions we have that  $I_{\text{adap}}^0(\chi, I_{\text{stim}})$  is monotonically decreasing w.r.t. both  $\chi$  and  $I_{\text{stim}}$ . The plateau function  $P(I_{\text{stim}})$  is also monotonically decreasing. We recall that  $\forall I_{\text{stim}} \in [I_{\text{stim}}^{\min}, I_{\text{stim}}^{\max}]$  and  $\forall \chi \in [t_{\text{spk}}^{\text{first}}(I_{\text{stim}}), t_{\text{spk}}^{\text{last}-1}(I_{\text{stim}})]$  we have that

$$P(I_{\text{stim}}) < F(\chi, I_{\text{stim}}) < c \text{ and } F(\chi, I_{\text{stim}}) < H(I_{\text{stim}}).$$

We observe that, with  $c > 0$  and  $I_{\text{stim}} > I_{\text{stim}}^{\max}$ , the Monod function remains positive only if the plateau function remains positive, i.e. when

$$a < 0, b > 0, \quad c > -a \quad I_{\text{stim}} < \frac{\log(-c/a)}{b}.$$

If this is not the case, the decreasing plateau might become negative, leading to negative values of the Monod function as well as for  $\chi > t^*$  for some  $t^* > 0$ . In this case, it is possible to shift the Monod function as done in Eq. (48) by defining

$$c^* := \frac{\alpha}{\beta} + \eta I_{\text{dep}}^0 + \frac{\delta}{\beta} (1 + V^0), \quad \eta \in [0, 1], \quad (62)$$

as long as the positivity of the Monod function is preserved; with this choice, both Eqs. (35) and (37) hold. Alternatively, it is possible to ensure at least the positivity of the Monod function by modifying it in a way that the plateau is shifted to zero, i.e. by choosing  $c^*$  in Eq. (48) such that

$$c^* = -a \exp(b I_{\text{stim}}) > 0. \quad (63)$$

As for  $I_{\text{stim}} < I_{\text{stim}}^{\min}$ , the plateau remains positive as long as  $P(I_{\text{stim}}^{\min}) > 0$ , so the only condition to verify is Eq. (37). If Eq. (37) does not hold, it is possible to modify the Monod function by applying the shift (48) with  $c^*$  as in Eq. (63).

(2.2)  $b < 0$ . In this case, according to Prop. 1, we have that  $I_{\text{adap}}^0(\chi, I_{\text{stim}})$  is monotonically decreasing w.r.t.  $\chi$  and increasing w.r.t.  $I_{\text{stim}}$ . Moreover, the plateau function  $P(I_{\text{stim}})$  is also monotonically increasing. In this case, the Monod function remains positive for any  $I_{\text{stim}} > I_{\text{stim}}^{\max}$  as long as

$I_{\text{adap}}^0(\chi, I_{\text{stim}}^{\text{max}}) > 0, \forall \chi > 0$ . This last condition is automatically verified when the plateau function associated to  $I_{\text{stim}}^{\text{max}}$  is positive, i.e.

$$P(I_{\text{stim}}^{\text{max}}) > 0 \implies 0 < P(I_{\text{stim}}^{\text{max}}) < P(I_{\text{stim}}) < F(\chi, I_{\text{stim}}) < c.$$

Equation (35) is hence in this case verified. For Eq. (37), it holds automatically if the threshold associated to  $I_{\text{stim}}^{\text{max}}$  is positive, i.e.

$$c \leq H(I_{\text{stim}}^{\text{max}}) \implies c \leq H(I_{\text{stim}}^{\text{max}}) \leq H(I_{\text{stim}}), \quad \forall I_{\text{stim}} > I_{\text{stim}}^{\text{max}}.$$

In the case of stimulation currents below the experimental range – i.e.  $I_{\text{stim}} < I_{\text{stim}}^{\text{min}}$  – the plateau might become negative after a certain instant  $t^*$ , violating Eq. (35). Moreover, Eq. (37) might also not hold. In these cases, it is possible to apply the transformation defined in Eqs. (48)-(63).
