# Supplementary material for: An Adaptive Generalized Leaky Integrate-and-Fire Model for Hippocampal CA1 Pyramidal Neurons and Interneurons
Source: Bull Math Biol. 2023 Oct 4;85(11):109. doi: 10.1007/s11538-023-01206-8 (PMC10550887; doi:10.1007/s11538-023-01206-8)
Supplement: Supplementary file 4 — Model’s parameters (PDF 42 KB) [file 11538_2023_1206_MOESM4_ESM.pdf]

| PYRAMIDAL NEURONS |            |                |                |                 |                |                 |                |         |       |         |       |                |                |                   |
|-------------------|------------|----------------|----------------|-----------------|----------------|-----------------|----------------|---------|-------|---------|-------|----------------|----------------|-------------------|
| #                 | NEURON ID. | E <sub>L</sub> | V <sub>r</sub> | V <sub>th</sub> | C <sub>m</sub> | I <sub>th</sub> | τ <sub>m</sub> | K       | β     | δ       | τ     | k <sub>1</sub> | k <sub>2</sub> | k <sub>adap</sub> |
| 1                 | 95810005   | -63.11         | -46.           | -34.99          | 2998.62        | 730.61          | 19304.94       | 6786.91 | 0.24  | 0.0014  | 27.89 | 0.0087         | 0.0359         | 0.9381            |
| 2                 | 95810006   | -62.9          | -44.8          | -33.71          | 2839.92        | 596.15          | 24332.30       | 7289.09 | 0.18  | 0.0010  | 24.51 | 0.0073         | 0.0408         | 0.8421            |
| 3                 | 95810007   | -63.           | -42.62         | -31.65          | 2640.76        | 595.50          | 12638.08       | 5016.46 | 0.24  | 0.0026  | 33.16 | 0.0073         | 0.0302         | 0.5794            |
| 4                 | 95810008   | -62.92         | -41.55         | -30.15          | 2935.78        | 562.35          | 1840.754       | 16582.7 | 0.073 | 0.0061  | 11.14 | 0.0066         | 0.0898         | 1.7280            |
| 5                 | 95810010   | -77.39         | -63.48         | -52.92          | 2998.63        | 585.91          | 96679.97       | 7606.69 | 0.24  | 0.00032 | 30.50 | 0.0080         | 0.0328         | 0.7868            |
| 6                 | 95810011   | -69.72         | -53.61         | -44.03          | 2983.24        | 567.37          | 82200.71       | 6190.23 | 0.25  | 0.00041 | 33.61 | 0.0074         | 0.0298         | 0.6581            |
| 7                 | 95810012   | -69.81         | -60.71         | -52.04          | 2993.93        | 15.468          | 85631.08       | 264.110 | 0.24  | 0.0092  | 791.4 | 0.0003         | 0.0013         | 0.0011            |
| 8                 | 95810013   | -69.89         | -64.26         | -51.83          | 2473.69        | 6.6709          | 72791.85       | 268.069 | 0.11  | 0.0089  | 644.8 | 0.0002         | 0.0016         | 0.0006            |
| 9                 | 95810014   | -69.96         | -57.75         | -51.3           | 2946.53        | 7.5975          | 7288.562       | 538.997 | 0.11  | 0.052   | 382.3 | 0.0003         | 0.0026         | 0.0022            |
| 10                | 95810015   | -69.86         | -58.17         | -51.33          | 1889.16        | 10.174          | 18236.08       | 205.589 | 0.22  | 0.035   | 642.1 | 0.0003         | 0.0016         | 0.0010            |
| 11                | 95810022   | -68.93         | -56.47         | -44.41          | 2978.17        | 201.07          | 81244.02       | 2544.03 | 0.22  | 0.00099 | 80.7  | 0.0028         | 0.0124         | 0.1021            |
| 12                | 95810023   | -68.9          | -56.01         | -43.68          | 2810.88        | 203.32          | 73475.86       | 2390.46 | 0.23  | 0.0011  | 80.99 | 0.0029         | 0.0123         | 0.1001            |
| 13                | 95810024   | -68.94         | -56.57         | -44.49          | 2638.95        | 205.64          | 78257.87       | 2393.69 | 0.24  | 0.00097 | 76.00 | 0.0032         | 0.0132         | 0.1112            |
| 14                | 95810025   | -68.89         | -55.82         | -43.66          | 2973.05        | 393.53          | 82342.54       | 4506.75 | 0.24  | 0.00055 | 45.44 | 0.0053         | 0.0220         | 0.3442            |
| 15                | 95810026   | -69.81         | -63.3          | -44.18          | 2098.20        | 403.39          | 30225.19       | 4534.27 | 0.24  | 0.0011  | 32.31 | 0.0075         | 0.0310         | 0.4894            |
| 16                | 95810027   | -69.85         | -62.85         | -44.43          | 2984.37        | 405.49          | 75711.25       | 4711.56 | 0.24  | 0.00058 | 44.26 | 0.0054         | 0.0226         | 0.3613            |
| 17                | 95810028   | -69.86         | -54.29         | -43.79          | 2654.68        | 552.25          | 64685.40       | 6375.63 | 0.23  | 0.00045 | 29.09 | 0.0080         | 0.0344         | 0.7295            |
| 18                | 95810029   | -69.89         | -52.19         | -43.77          | 2668.84        | 592.85          | 1824.234       | 6725.97 | 0.25  | 0.015   | 27.73 | 0.0091         | 0.0361         | 0.8717            |
| 19                | 95810030   | -65.37         | -56.48         | -41.83          | 2986.94        | 219.87          | 50233.55       | 2492.04 | 0.25  | 0.0016  | 78.36 | 0.0031         | 0.0128         | 0.1199            |
| 20                | 95810031   | -72.95         | -58.13         | -56.71          | 2788.15        | 3.6663          | 62701.20       | 201.732 | 0.099 | 0.016   | 1008. | 0.0001         | 0.0010         | 0.0003            |
| 21                | 95810032   | -59.82         | -62.62         | -42.37          | 1023.88        | 5.0945          | 11678.68       | 84.1546 | 0.27  | 0.062   | 727.7 | 0.0004         | 0.0014         | 0.0005            |
| 22                | 95810033   | -65.85         | -58.91         | -45.36          | 2753.39        | 7.2598          | 35118.23       | 295.181 | 0.098 | 0.017   | 614.5 | 0.0002         | 0.0016         | 0.0007            |
| 23                | 95810037   | -65.88         | -66.66         | -51.03          | 1996.50        | 7.1148          | 98786.96       | 149.401 | 0.22  | 0.0089  | 880.3 | 0.0003         | 0.0011         | 0.0006            |
| 24                | 95810038   | -65.95         | -66.74         | -51.1           | 2907.63        | 4.8747          | 26782.56       | 483.352 | 0.062 | 0.015   | 396.7 | 0.0002         | 0.0025         | 0.0011            |
| 25                | 95810039   | -65.8          | -66.58         | -51.02          | 2901.24        | 8.5130          | 59415.43       | 194.401 | 0.21  | 0.017   | 982.2 | 0.0002         | 0.0010         | 0.0006            |
| 26                | 95810040   | -65.99         | -66.93         | -51.46          | 2795.08        | 3.4871          | 21414.76       | 262.075 | 0.095 | 0.033   | 703.9 | 0.0001         | 0.0014         | 0.0005            |
| 27                | 95810041   | -65.97         | -55.68         | -46.08          | 2993.05        | 204.34          | 75004.83       | 2837.39 | 0.24  | 0.00093 | 69.56 | 0.0035         | 0.0144         | 0.1486            |
| 28                | 95817003   | -69.94         | -58.41         | -49.46          | 2961.59        | 582.87          | 22931.88       | 8090.58 | 0.25  | 0.0011  | 25.60 | 0.0097         | 0.0391         | 1.1180            |
| 29                | 95817004   | -59.85         | -45.75         | -42.82          | 2993.98        | 200.35          | 89032.42       | 2909.89 | 0.24  | 0.00069 | 61.57 | 0.0039         | 0.0162         | 0.1916            |
| 30                | 95817005   | -74.04         | -54.59         | -53.08          | 2970.50        | 553.88          | 30136.08       | 8116.00 | 0.24  | 0.00090 | 27.11 | 0.0089         | 0.0369         | 0.9788            |
| 31                | 95817006   | -74.03         | -54.07         | -52.            | 2992.12        | 569.23          | 73773.30       | 9222.80 | 0.21  | 0.00033 | 24.03 | 0.0087         | 0.0416         | 1.0790            |
| 32                | 95817007   | -69.63         | -50.18         | -44.5           | 2946.98        | 362.39          | 58758.02       | 4063.71 | 0.25  | 0.00086 | 50.49 | 0.0049         | 0.0198         | 0.2867            |
| 33                | 95817008   | -68.9          | -50.46         | -43.78          | 2894.86        | 349.32          | 42334.75       | 4095.85 | 0.24  | 0.0011  | 48.68 | 0.0048         | 0.0205         | 0.2874            |
| 34                | 95822000   | -69.87         | -65.26         | -53.27          | 2025.15        | 1.9530          | 52167.20       | 197.393 | 0.057 | 0.014   | 716.9 | 0.0001         | 0.0014         | 0.0002            |
| 35                | 95822001   | -69.95         | -65.72         | -53.83          | 2911.84        | 1.4517          | 39090.49       | 126.451 | 0.093 | 0.041   | 1610. | 0.0001         | 0.0006         | 0.0001            |
| 36                | 95822002   | -69.33         | -52.41         | -54.32          | 2886.04        | 0.47183         | 32764.57       | 57.6564 | 0.15  | 0.11    | 3469. | 0.0000         | 0.0003         | 0.0000            |
| 37                | 95822003   | -69.77         | -51.75         | -54.6           | 2848.62        | 7.4124          | 81108.61       | 172.290 | 0.21  | 0.014   | 1153. | 0.0002         | 0.0009         | 0.0005            |
| 38                | 95822005   | -70.07         | -61.25         | -55.2           | 2877.83        | 26.133          | 10955.36       | 839.157 | 0.17  | 0.022   | 240.3 | 0.0            |                |                   |
